# Supplementary material
Source: publisher site journal article supplement (https://www.dovepress.com/article/418818)
Supplement: Supplementary file 1 [file get_supplementary_file.php]

**SUPPLEMENTARY MATERIALS**

**TABLE S1.** Treatment duration and annualized FIX concentrate dosage by age

| Parameter                                       | SHL FIX concentrates       |                            |                                                       | EHL FIX concentrates       |                            |                            |
|-------------------------------------------------|----------------------------|----------------------------|-------------------------------------------------------|----------------------------|----------------------------|----------------------------|
|                                                 | Nonacog alfa               | Nonacog gamma              | Freeze-dried Concentrated Human Blood Coagulation FIX | Albutrepenonacog alfa      | Eftrenonacog alfa          | Nonacog beta pegol         |
| <b>Age 0–11 years</b>                           | <b>n=21</b>                | <b>n=0</b>                 | <b>n=4</b>                                            | <b>n=14</b>                | <b>n=14</b>                | <b>n=0</b>                 |
| Annualized FIX dosage (IU/kg), median (Q1, Q3)  | 5419.9<br>(3312.7, 7230.1) | —                          | 873.6<br>(362.1, 5169.7)                              | 2590.6<br>(1698.7, 3171.0) | 2701.0<br>(1712.6, 3008.3) | —                          |
| Observed treatment duration by age group, n (%) |                            |                            |                                                       |                            |                            |                            |
| <6 months                                       | 4 (16.0)                   | 0 (0)                      | 2 (50.0)                                              | 5 (27.8)                   | 7 (46.7)                   | 0 (0)                      |
| 6 to <12 months                                 | 1 (4.0)                    | 0 (0)                      | 0 (0)                                                 | 2 (11.1)                   | 0 (0)                      | 0 (0)                      |
| 1 to <2 years                                   | 5 (20.0)                   | 0 (0)                      | 1 (25.0)                                              | 5 (27.8)                   | 2 (13.3)                   | 0 (0)                      |
| 2 to <3 years                                   | 7 (28.0)                   | 0 (0)                      | 1 (25.0)                                              | 6 (33.3)                   | 2 (13.3)                   | 0 (0)                      |
| ≥3 years                                        | 8 (32.0)                   | 0 (0)                      | 0 (0)                                                 | 0                          | 4 (26.7)                   | 0 (0)                      |
| <b>Age 12–19 years</b>                          | <b>n=21</b>                | <b>n=1</b>                 | <b>n=10</b>                                           | <b>n=21</b>                | <b>n=13</b>                | <b>n=2</b>                 |
| Annualized FIX dosage, median (Q1, Q3), IU/kg   | 4422.9<br>(2399.9, 5766.6) | 3181.4<br>(3181.4, 3181.4) | 1922.5<br>(1266.7, 3180.6)                            | 2599.6<br>(1729.1, 3187.2) | 2070.7<br>(669.8, 2657.5)  | 2195.1<br>(2148.0, 2242.2) |
| Observed treatment duration by age group, n (%) |                            |                            |                                                       |                            |                            |                            |
| <6 months                                       | 6 (21.4)                   | 0 (0)                      | 2 (20.0)                                              | 7 (26.9)                   | 4 (26.7)                   | 1 (50.0)                   |
| 6 to <12 months                                 | 4 (14.3)                   | 0 (0)                      | 0 (0)                                                 | 4 (15.4)                   | 2 (13.3)                   | 1 (50.0)                   |
| 1 to <2 years                                   | 3 (10.7)                   | 0 (0)                      | 3 (30.0)                                              | 13 (50.0)                  | 4 (26.7)                   | 0 (0)                      |
| 2 to <3 years                                   | 8 (28.6)                   | 0 (0)                      | 2 (20.0)                                              | 2 (7.7)                    | 5 (33.3)                   | 0 (0)                      |
| ≥3 years                                        | 7 (25.0)                   | 1 (100.0)                  | 3 (30.0)                                              | 0 (0)                      | 0 (0)                      | 0 (0)                      |

| <b>Age 20–64 years</b>                          | <b>n=37</b>               | <b>n=0</b> | <b>n=34</b>                | <b>n=19</b>                | <b>n=52</b>                | <b>n=3</b>                 |
|-------------------------------------------------|---------------------------|------------|----------------------------|----------------------------|----------------------------|----------------------------|
| Annualized FIX dosage, median (Q1, Q3), IU/kg   | 1895.3<br>(762.1, 3120.8) | –          | 2925.3<br>(1319.7, 4077.0) | 1885.0<br>(1457.4, 2258.9) | 2459.0<br>(1914.8, 3883.3) | 1437.2<br>(1368.5, 1505.9) |
| Observed treatment duration by age group, n (%) |                           |            |                            |                            |                            |                            |
| <6 months                                       | 9 (21.4)                  | 0 (0)      | 26 (43.3)                  | 9 (37.5)                   | 27 (33.3)                  | 2 (66.7)                   |
| 6 to <12 months                                 | 5 (11.9)                  | 0 (0.0)    | 10 (16.7)                  | 4 (16.7)                   | 10 (12.4)                  | 1 (33.3)                   |
| 1 to <2 years                                   | 5 (11.9)                  | 0 (0.0)    | 6 (10.0)                   | 8 (33.3)                   | 14 (17.3)                  | 0 (0)                      |
| 2 to <3 years                                   | 10 (23.8)                 | 0 (0.0)    | 6 (10.0)                   | 3 (12.5)                   | 19 (23.5)                  | 0 (0)                      |
| ≥3 years                                        | 13 (31.0)                 | 0 (0.0)    | 12 (20.0)                  | 0 (0)                      | 11 (13.6)                  | 0 (0)                      |
| <b>Age ≥65 years</b>                            | <b>n=9</b>                | <b>n=0</b> | <b>n=3</b>                 | <b>n=3</b>                 | <b>n=8</b>                 | <b>n=2</b>                 |
| Annualized FIX dosage, median (Q1, Q3), IU/kg   | 1976.5<br>(536.0, 4222.3) | –          | 707.9<br>(436.6, 1671.0)   | 2026.5<br>(640.0, 3412.9)  | 2285.2<br>(1726.9, 2539.2) | 1165.4<br>(822.0, 1508.8)  |
| Observed treatment duration by age group, n (%) |                           |            |                            |                            |                            |                            |
| <6 months                                       | 3 (33.3)                  | 0 (0)      | 2 (66.7)                   | 2 (66.7)                   | 1 (12.5)                   | 0 (0)                      |
| 6 to <12 months                                 | 2 (22.2)                  | 0 (0)      | 1 (33.3)                   | 0 (0)                      | 1 (12.5)                   | 2 (100.0)                  |
| 1 to <2 years                                   | 0 (0)                     | 0 (0)      | 0 (0)                      | 1 (33.3)                   | 1 (12.5)                   | 0 (0)                      |
| 2 to <3 years                                   | 3 (33.3)                  | 0 (0)      | 0 (0)                      | 0 (0)                      | 2 (25.0)                   | 0 (0)                      |
| ≥3 years                                        | 1 (11.1)                  | 0 (0)      | 0 (0)                      | 0 (0)                      | 3 (37.5)                   | 0 (0)                      |

**Abbreviations:** EHL, extended half-life; FIX, factor IX; IU, international units; Q, quarter; SHL, standard half-life

**TABLE S2.** Prevalence of joint damage and hospitalization with or because of bleeding events among the study population, by age group

| <b>Parameter</b>                                                     | <b>Age 0–11 y<br/>(n=36)</b>                 | <b>Age 12–9 y<br/>(n=38)</b> | <b>Age 20–64 y<br/>(n=106)</b> | <b>Age ≥65 y<br/>(n=17)</b> |                                                            |                           |                            |                         |
|----------------------------------------------------------------------|----------------------------------------------|------------------------------|--------------------------------|-----------------------------|------------------------------------------------------------|---------------------------|----------------------------|-------------------------|
| Patients with joint damage, n (%)                                    | 18 (50.0)                                    | 29 (76.3)                    | 62 (58.5)                      | 7 (41.2)                    |                                                            |                           |                            |                         |
| Prevalence rate of joint damage per 100 patient-years, rate (95% CI) | 15.0 (8.0–21.0)                              | 21.0 (14.0–28.0)             | 18.0 (14.0–22.0)               | 17.0 (6.0–29.0)             |                                                            |                           |                            |                         |
|                                                                      | <b>Hospitalization With Bleeding, by age</b> |                              |                                |                             | <b>Hospitalization Because of a Bleeding Event, by age</b> |                           |                            |                         |
| <b>Parameter</b>                                                     | <b>0–11 y<br/>(n=36)</b>                     | <b>12–19 y<br/>(n=38)</b>    | <b>20–64 y<br/>(n=106)</b>     | <b>≥65 y<br/>(n=17)</b>     | <b>0–11 y<br/>(n=36)</b>                                   | <b>12–19 y<br/>(n=38)</b> | <b>20–64 y<br/>(n=106)</b> | <b>≥65 y<br/>(n=17)</b> |
| Patients with hospitalization, n (%)                                 | 5 (13.9)                                     | 9 (23.7)                     | 12 (11.3)                      | 4 (23.5)                    | 0 (0)                                                      | 1 (2.6)                   | 5 (4.7)                    | 0 (0)                   |
| Incidence of hospitalization per 100 patient-years (95% CI), rate    | 1.0<br>(0.0–2.0)                             | 1.0<br>(0.0–3.0)             | 1.0<br>(0.0–2.0)               | 5.0<br>(0.0–10.0)           | 0<br>(0–0)                                                 | 0<br>(0–0)                | 1.0<br>(0.0–1.0)           | 0.0<br>(0.0–0.0)        |
| Length of hospitalization, median (Q1, Q3), days                     | 8.0<br>(3.0, 11.0)                           | 5.0<br>(3.0, 10.0)           | 20.0<br>(11.0, 21.0)           | 44.0<br>(21.0, 62.5)        | –                                                          | 16.0<br>(10.0, 27.0)      | 13.0<br>(11.0, 13.0)       | –                       |

**Abbreviations:** CI, confidence interval; Q, quarter

**Table S3.** Expenditure type per year, by age group

| <b>Expenditure Type</b>                                                 | <b>Overall</b>                               | <b>2015</b>                                 | <b>2016</b>                                 | <b>2017</b>                                 | <b>2018</b>                                  | <b>2019</b>                                  |
|-------------------------------------------------------------------------|----------------------------------------------|---------------------------------------------|---------------------------------------------|---------------------------------------------|----------------------------------------------|----------------------------------------------|
| <b>Age 0–11 years</b>                                                   | <b>n=34</b>                                  | <b>n=19</b>                                 | <b>n=21</b>                                 | <b>n=28</b>                                 | <b>n=30</b>                                  | <b>n=29</b>                                  |
| Annual total health care expenditures, median (Q1, Q3), yen             | ¥11,752,467<br>(¥4,349,971,<br>¥19,170,710)  | ¥11,069,298<br>(¥6,942,856,<br>¥18,752,942) | ¥10,846,122<br>(¥6,019,086,<br>¥22,139,836) | ¥12,819,837<br>(¥5,419,794,<br>¥18,820,610) | ¥13,810,393<br>(¥4,332,760,<br>¥30,449,500)  | ¥12,971,832<br>(¥5,685,549,<br>¥32,931,592)  |
| Annual expenditures for FIX concentrate treatment, median (Q1, Q3), yen | ¥11,147,226<br>(¥4,307,505,<br>¥19,082,340)  | ¥11,012,658<br>(¥6,777,070,<br>¥18,124,400) | ¥10,804,872<br>(¥5,581,830,<br>¥22,025,316) | ¥12,603,537<br>(¥5,084,323,<br>¥18,617,662) | ¥12,060,687<br>(¥4,047,060,<br>¥29,293,928)  | ¥12,903,816<br>(¥5,580,449,<br>¥32,809,447)  |
| <b>Age 12–19 years</b>                                                  | <b>n=33</b>                                  | <b>n=23</b>                                 | <b>n=22</b>                                 | <b>n=28</b>                                 | <b>n=27</b>                                  | <b>n=22</b>                                  |
| Annual total health care expenditures, median (Q1, Q3), yen             | ¥21,542,459<br>(¥12,206,800,<br>¥27,407,632) | ¥12,603,928<br>(¥4,529,996,<br>¥18,307,496) | ¥12,260,776<br>(¥6,357,880,<br>¥21,519,296) | ¥19,080,629<br>(¥9,889,142,<br>¥26,245,859) | ¥23,289,255<br>(¥11,395,844,<br>¥31,687,928) | ¥33,312,034<br>(¥25,508,300,<br>¥42,130,413) |
| Annual expenditures for FIX concentrate treatment, median (Q1, Q3), yen | ¥20,937,317<br>(¥12,151,993,<br>¥27,291,264) | ¥12,320,525<br>(¥3,383,580,<br>¥18,254,432) | ¥12,165,878<br>(¥6,321,700,<br>¥21,414,626) | ¥17,003,519<br>(¥9,812,640,<br>¥25,969,636) | ¥23,068,524<br>(¥11,298,801,<br>¥31,608,500) | ¥30,493,321<br>(¥25,394,767,<br>¥42,039,368) |
| <b>Age 20–64 years</b>                                                  | <b>n=91</b>                                  | <b>n=41</b>                                 | <b>n=43</b>                                 | <b>n=81</b>                                 | <b>n=82</b>                                  | <b>n=70</b>                                  |
| Annual total health care expenditures, median (Q1, Q3), yen             | ¥23,233,733<br>(¥7,285,670,<br>¥36,007,472)  | ¥9,057,510<br>(¥4,676,570,<br>¥14,778,748)  | ¥19,411,212<br>(¥5,112,075,<br>¥34,533,108) | ¥22,389,024<br>(¥8,453,780,<br>¥32,493,080) | ¥25,511,540<br>(¥8,809,688,<br>¥39,974,307)  | ¥31,898,870<br>(¥9,998,964,<br>¥45,963,061)  |
| Annual expenditures for FIX concentrate treatment, median (Q1, Q3), yen | ¥21,757,598<br>(¥7,175,597,<br>¥33,310,288)  | ¥8,673,434<br>(¥2,908,890,<br>¥11,784,850)  | ¥16,962,080<br>(¥4,511,990,<br>¥32,872,840) | ¥21,809,865<br>(¥8,218,210,<br>¥30,752,328) | ¥22,960,827<br>(¥8,653,205,<br>¥37,107,495)  | ¥30,718,086<br>(¥9,242,460,<br>¥41,939,394)  |
| <b>Age ≥65 years</b>                                                    | <b>n=10</b>                                  | <b>n=3</b>                                  | <b>n=4</b>                                  | <b>n=9</b>                                  | <b>n=10</b>                                  | <b>n=9</b>                                   |

|                                                                         |                                              |                                             |                                              |                                             |                                             |                                              |
|-------------------------------------------------------------------------|----------------------------------------------|---------------------------------------------|----------------------------------------------|---------------------------------------------|---------------------------------------------|----------------------------------------------|
| Annual total health care expenditures, median (Q1, Q3), yen             | ¥19,431,739<br>(¥13,610,516,<br>¥32,651,034) | ¥13,044,661<br>(¥4,430,256,<br>¥13,529,333) | ¥21,232,633<br>(¥15,215,042,<br>¥26,624,829) | ¥15,804,015<br>(¥9,732,685,<br>¥31,669,251) | ¥20,016,821<br>(¥9,890,315,<br>¥32,225,380) | ¥26,708,968<br>(¥20,209,360,<br>¥35,609,973) |
| Annual expenditures for FIX concentrate treatment, median (Q1, Q3), yen | ¥19,185,104<br>(¥11,628,447,<br>¥31,126,798) | ¥12,721,560<br>(¥4,374,634,<br>¥13,301,040) | ¥21,064,054<br>(¥15,034,214,<br>¥26,330,068) | ¥15,689,924<br>(¥9,541,170,<br>¥28,498,426) | ¥18,661,468<br>(¥9,541,170,<br>¥32,145,730) | ¥26,629,468<br>(¥18,708,705,<br>¥35,326,236) |

**Abbreviations:** FIX, factor IX; Q, quarter

**Supplementary Figure S1. Outpatient use of FIX concentrates, ages 0–11 years**

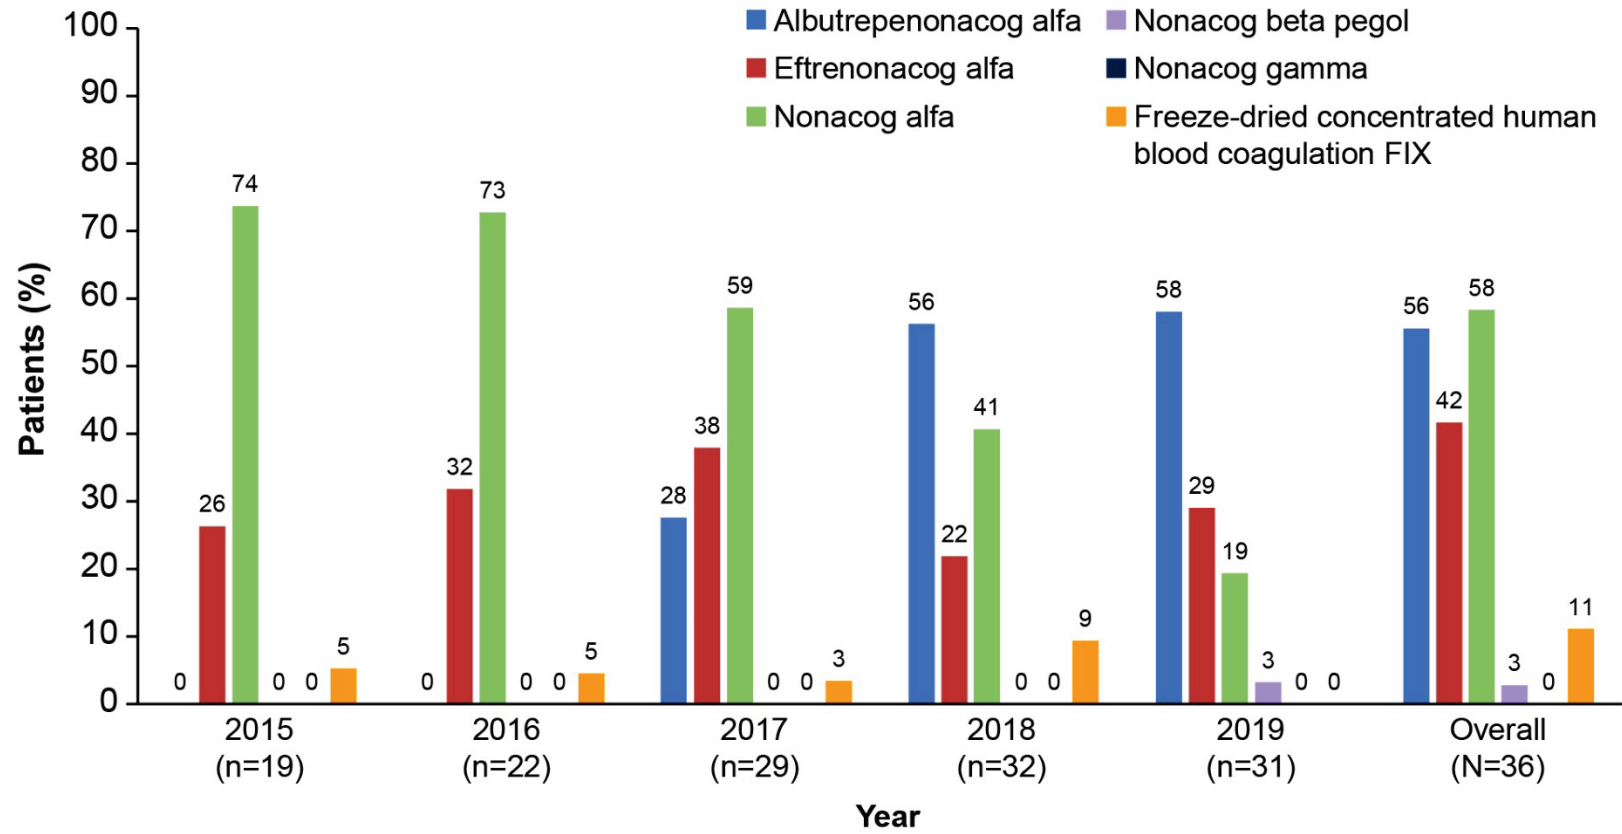

FIX, factor IX.

**Supplementary Figure S2. Outpatient use of FIX concentrates, ages 12–19 years**

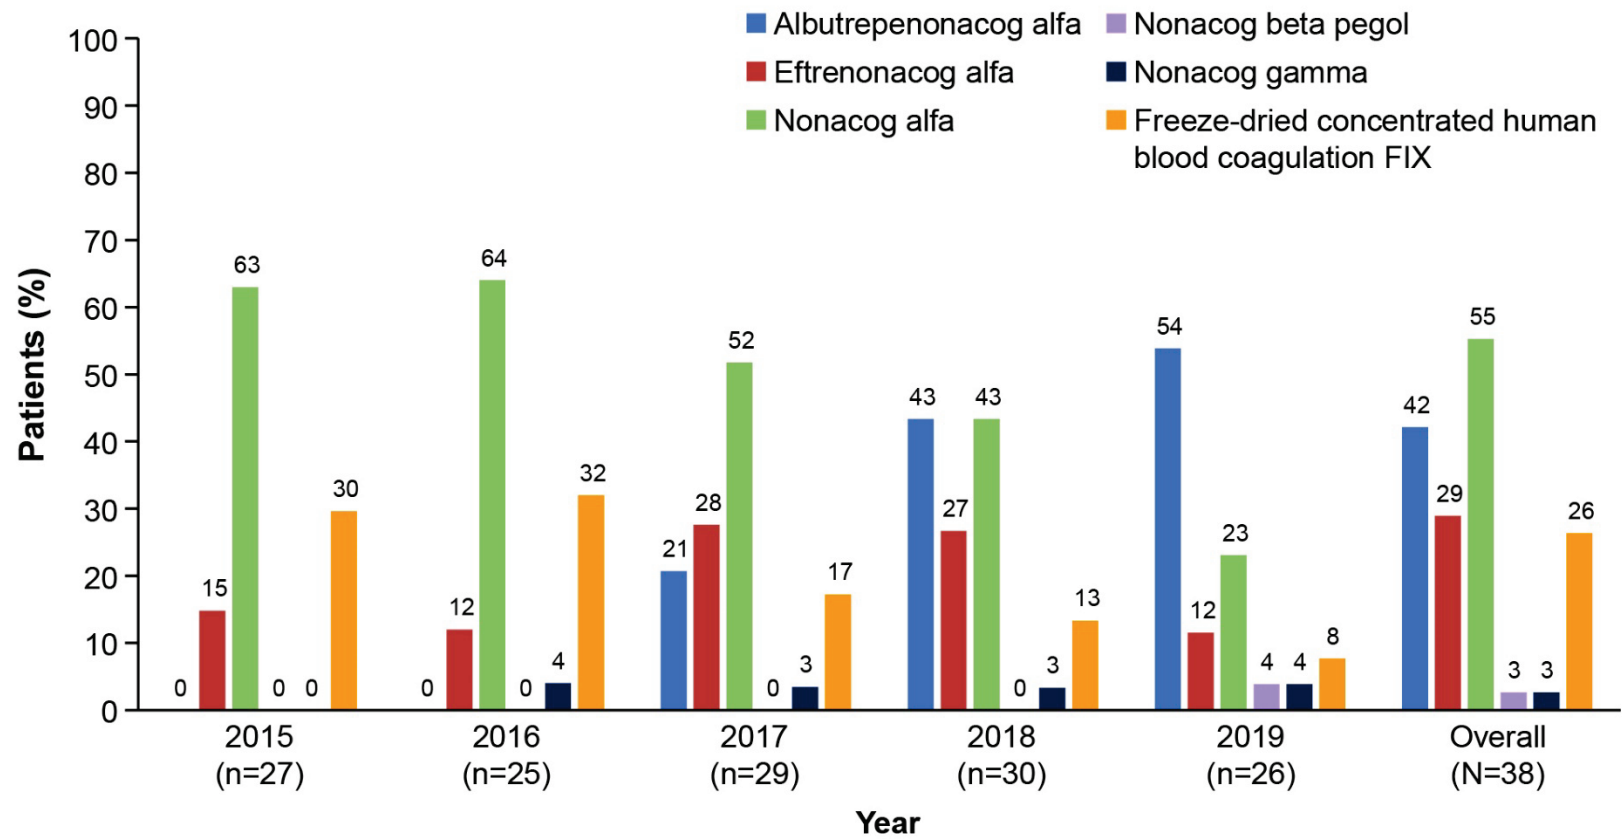

FIX, factor IX.

**Supplementary Figure S3. Outpatient use of FIX concentrates, ages 20–64 years**

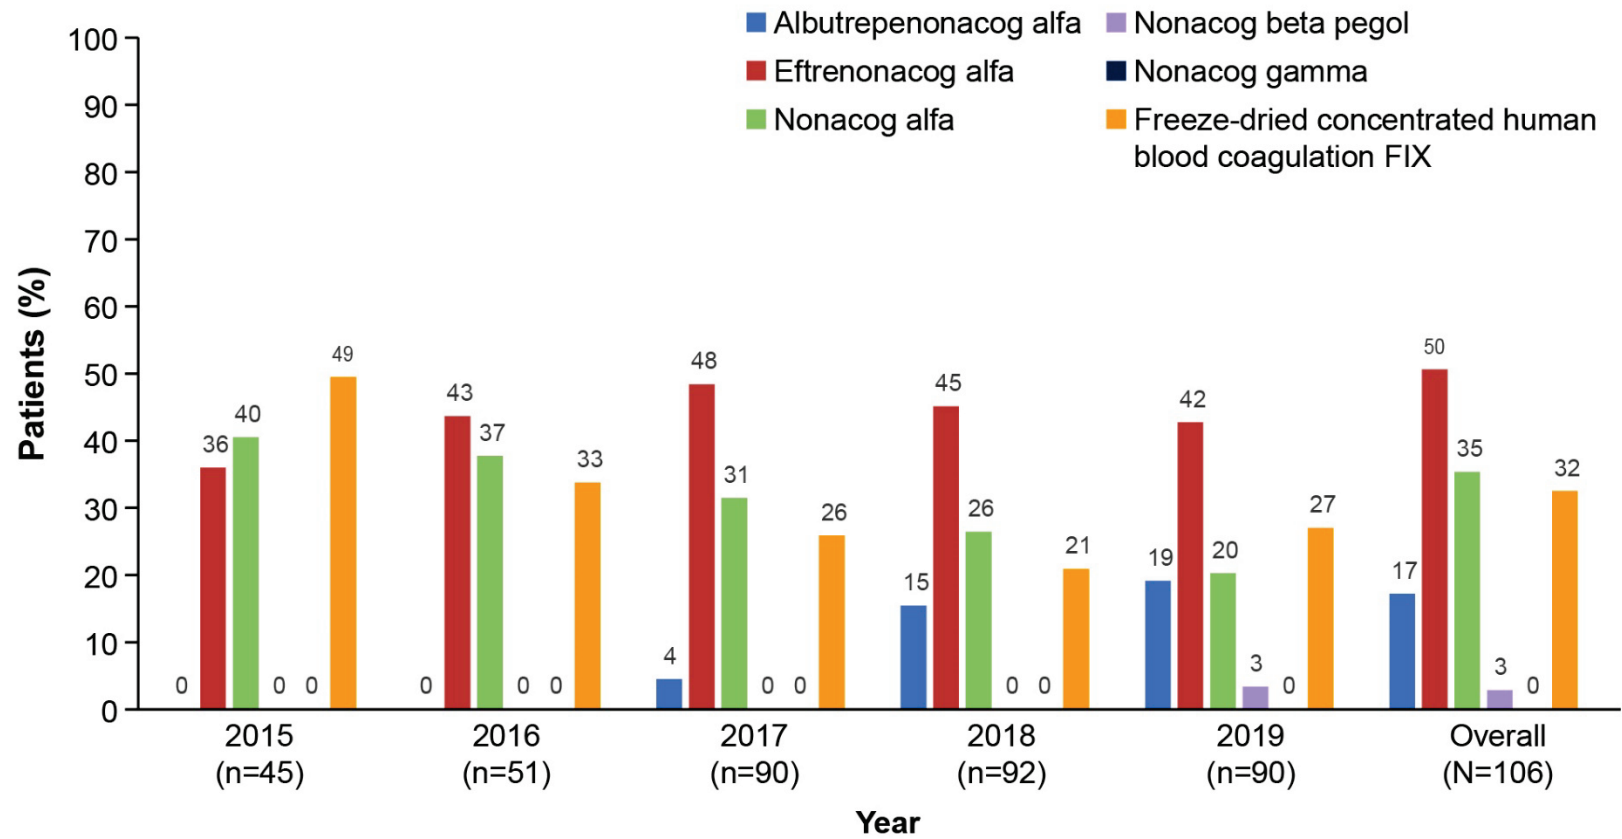

FIX, factor IX.



**Supplementary Figure S4. Outpatient use of FIX concentrates, ages 65+ years**

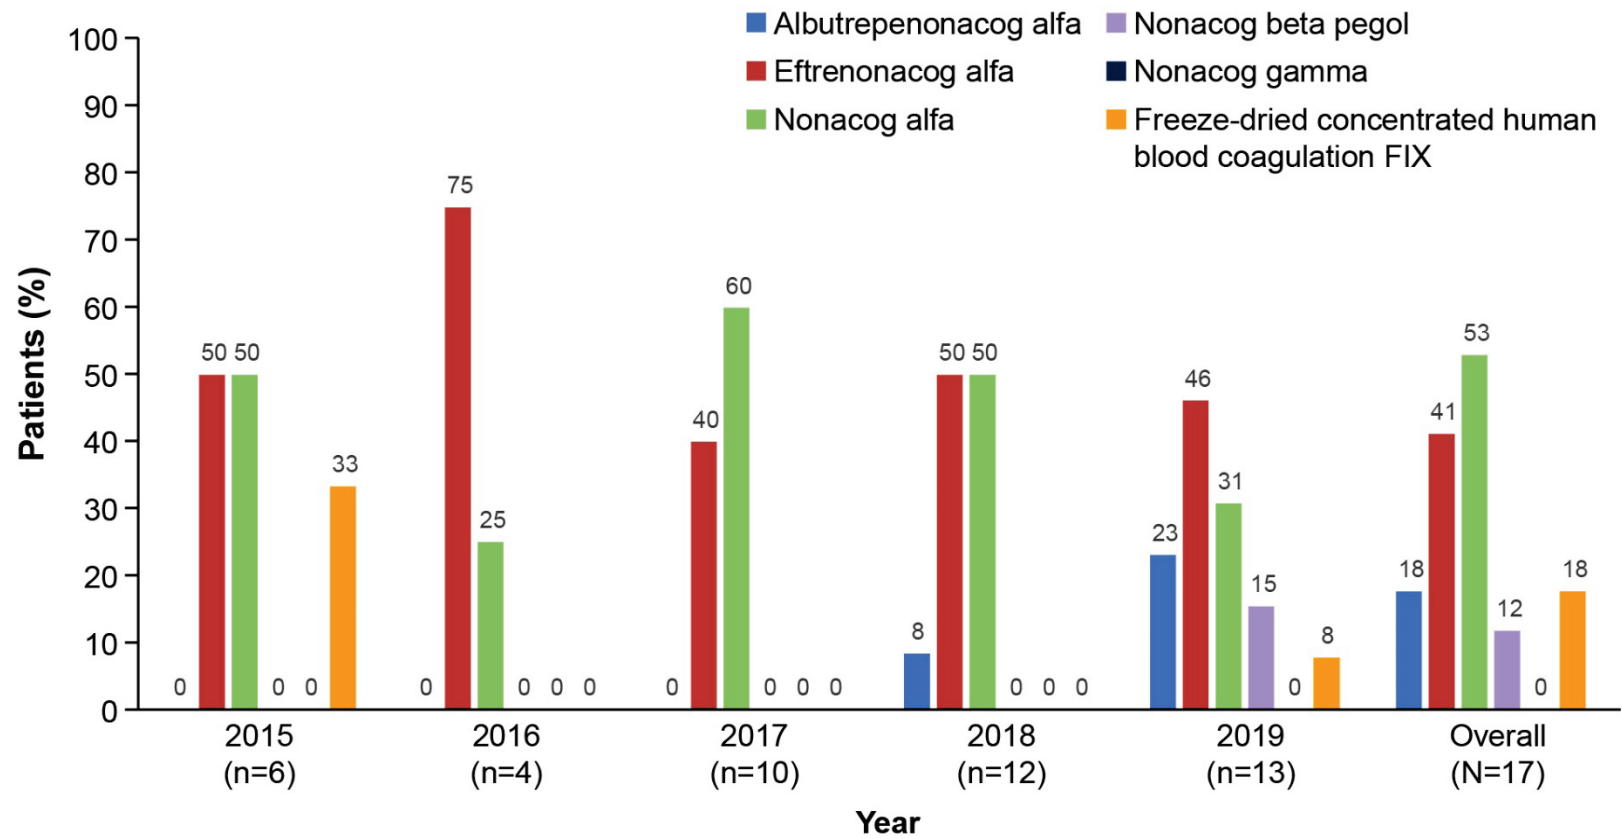

FIX, factor IX.
